# Supplementary material for: Crossing the Thauer limit: rewiring cyanobacterial metabolism to maximize fermentative H2production
Source: Royal Society of Chemistry journal article supplement (doi:10.1039/c8ee03606c), 2019-01-01
Supplement: c8ee03606c1.pdf [file c8ee03606c1.pdf]

## Supplementary Figures

**Fig. S1**

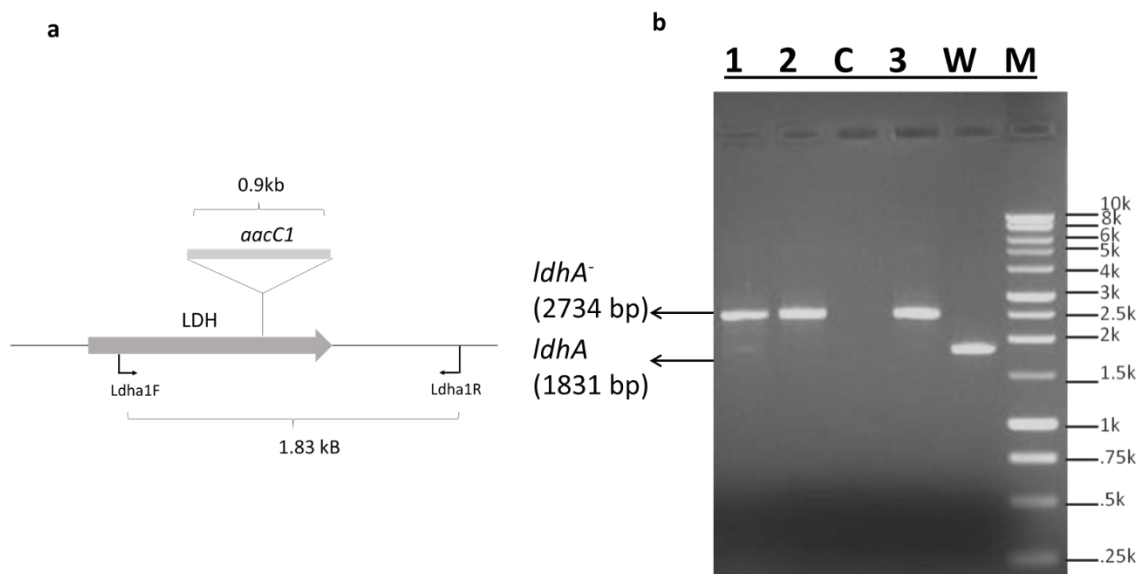

**Figure S1:** A) Schematic representation of the insertion of the gentamicin resistance cassette into the *ldhA* gene locus in  $\Delta gap1$  and  $gap1^{OEx}$  strains. Using primers LdhA1F and LdhA1R the gentamicin marker and the associated *ldhA* gene segments were PCR amplified from the *ldhA::aacC1* strain described previously<sup>13</sup>. The PCR fragment was used to transform  $\Delta gap1$  and  $gap1^{OEx}$  strains via homologous recombination to create  $\Delta gap1\Delta ldhA$  and  $gap1^{OEx}\Delta ldhA$ . B) Electrophoretic analysis of PCR products to evaluate putative mutants. Using genomic DNA from  $gap1^{OEx}\Delta ldhA$  (1),  $\Delta gap1\Delta ldhA$  (2),  $\Delta ldhA$  (3) and WT *Synechococcus* 7002 (W), *ldhA* locus was amplified with LdhA1F and LdhA1R. C represents no template control PCR reaction. The amplicon from the transformants are larger than the corresponding amplicon from WT. Presence of a single 2.7 kb band in the transformants demonstrates complete segregation of  $\Delta ldhA::aacC1$  and *ldhA* alleles. DNA size markers are in M lane.

**Fig. S2**

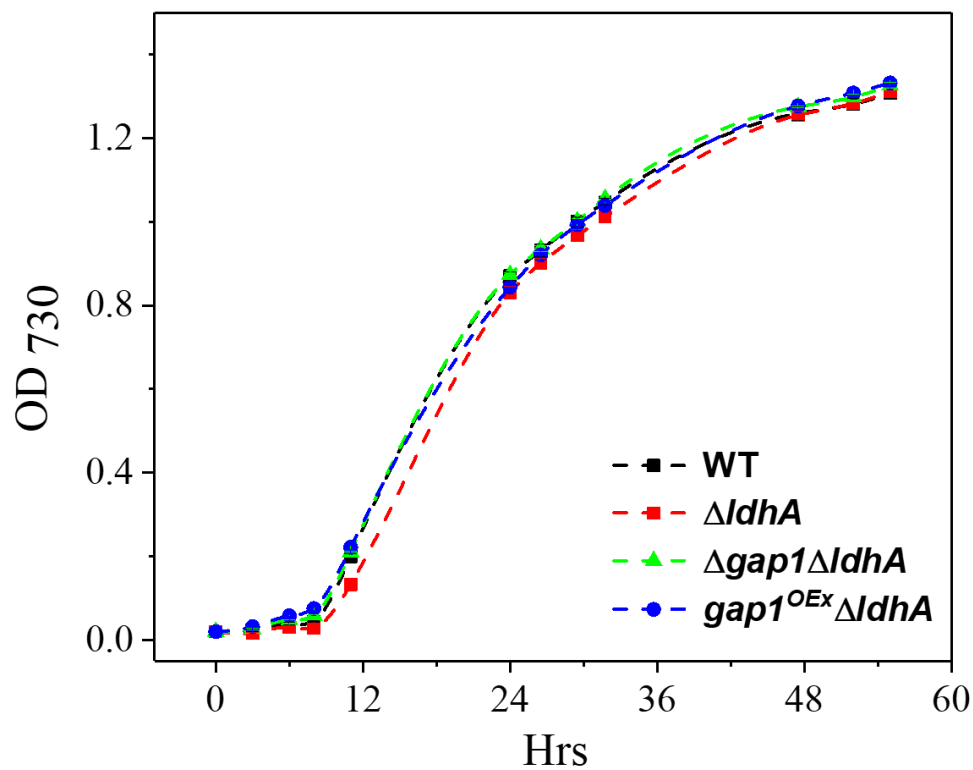

**Figure S2** Growth curve for WT,  $\Delta ldhA$ ,  $\Delta gap1\Delta ldhA$ , and  $gap1^{OEx}\Delta ldhA$  strains of *Synechococcus* 7002 cultured under continuous illumination of  $200 \mu\text{mol photons m}^{-2} \text{s}^{-1}$  with 2% (v/v)  $\text{CO}_2$  sparging in batch cultures. Data represents average and standard error for three biological replicates.
